# Supplementary material for: Donor–acceptor interaction-driven folding of linear naphthalene–glycol oligomers templated by a rigid bipyridinium rod
Source: Royal Society of Chemistry journal article supplement (doi:10.1039/c5qo00244c), 2015-01-01
Supplement: c5qo00244c1.pdf [file c5qo00244c1.pdf]

# Electronic Supplementary Information

## Donor-acceptor interaction-driven folding of linear naphthalene-glycol oligomers templated by a rigid bipyridinium rod

Tian-Guang Zhan,<sup>a</sup> Ben-Ye Lu,<sup>a</sup> Feng Lin,<sup>a</sup> Tian-You Zhou,<sup>a</sup> Xin Zhao,<sup>\*a</sup> and

Zhan-Ting Li<sup>\*a,b</sup>

<sup>a</sup> Key Laboratory of Synthetic and Self-assembly Chemistry for Organic Functional  
Molecules, Shanghai Institute of Organic Chemistry, Chinese Academy of Sciences,  
345 Lingling Road, Shanghai 200032, China

<sup>b</sup> Department of Chemistry, Fudan University, 220 Handan Road, Shanghai 200433,  
China.  
E-mail: xzhao@mail.sioc.ac.cn, ztli@mail.sioc.ac.cn

### Table of Contents

|                                                                                                                                                  |       |
|--------------------------------------------------------------------------------------------------------------------------------------------------|-------|
| <b>Synthesis and Characterizations</b> .....                                                                                                     | 2-4   |
| <b>Typical procedures for the spectroscopic experiments</b> .....                                                                                | 5     |
| <b>Figure S1-S4</b> Partial <sup>1</sup> H NMR spectra of <b>PBDV</b> after being mixed with equivalent <b>D<sub>1</sub>-D<sub>4</sub></b> ..... | 6-7   |
| <b>Figure S5</b> Chemical shift changes of <b>PBDV</b> protons after being mixed with equivalent <b>D<sub>1</sub>-D<sub>4</sub></b> .....        | 7     |
| <b>Figure S6</b> Colors of the solutions of the mixtures of <b>PBDV</b> and equivalent <b>D<sub>1</sub>-D<sub>4</sub></b> .....                  | 8     |
| <b>Figure S7</b> Fluorescence titration plots of <b>D<sub>1</sub>-D<sub>4</sub></b> vs concentration.....                                        | 8     |
| <b>Figure S8</b> Fluorescence titration spectra of <b>D<sub>1</sub>-D<sub>3</sub></b> with <b>PBDV</b> .....                                     | 9     |
| <b>Figure S9</b> Job's plots of <b>PBDV</b> with <b>D<sub>1</sub>-D<sub>3</sub></b> .....                                                        | 9     |
| <b>Figure S10.</b> UV-vis titration spectra of <b>D<sub>1</sub>-D<sub>4</sub></b> with <b>PBDV</b> .....                                         | 10    |
| <b>Figure S11-S14</b> Energy diagrams of optimized structures of <b>PBDV</b> with <b>D<sub>1</sub>-D<sub>4</sub></b> .....                       | 10-12 |
| <b>Figure S15-S17</b> NOESY spectra of <b>PBDV</b> with <b>D<sub>1</sub>-D<sub>3</sub></b> .....                                                 | 12-13 |
| <b>Figure S18-S21</b> <sup>1</sup> H NMR and <sup>13</sup> C NMR spectra of new compounds.....                                                   | 14-17 |
| <b>References</b> .....                                                                                                                          | 18    |

**Compound 1.** 3,6-dichloropyridazine (2.0g, 13.5mmol) and 4,4'-bipyridine (10.5 g, 67.3 mmol) was placed in a 25 mL Shrek tube, which was then degassed and recharged with argon and sealed. The mixtures were heated to 120°C for 2 days. After being cooled to room temperature, the resulting solid was washed with acetone and diethyl ether and further recrystallized in CH<sub>3</sub>OH to give compound **1** as a grey solid (4.0 g, 64%). <sup>1</sup>H NMR (400MHz,CD<sub>3</sub>OD): δ 9.96 (d, *J* = 8.0 Hz, 4H), 9.16 (s, 2H), 8.94 (t, 8 H), 8.18 (d, *J* = 4.0 Hz, 4H). <sup>13</sup>C NMR (125MHz, CD<sub>3</sub>OD): δ 159.29, 159.27, 152.07, 145.30, 142.97, 128.54, 127.34 and 123.85. MS(ESI): *m/z* 195.2 [M-2Cl]<sup>2+</sup>. HRMS(MALDI): Calcd. for C<sub>24</sub>H<sub>18</sub>N<sub>6</sub>: 390.1587. Found: 390.1585.

**Compound PBDV.** Compound **1** (0.46 g, 1.0 mmol), anhydrous CH<sub>3</sub>CN (15 mL) and CH<sub>3</sub>I (2.4 mL) were mixed in a 25 mL Shrek tube and was then heated to 60°C for 4 days after being degassed and recharged with argon. When the reaction completed (monitored by TLC), the mixture was cooled to room temperature and the resulting precipitate was washed with acetone to give a red solid. It was further dissolved in H<sub>2</sub>O (60 mL) and NH<sub>4</sub>PF<sub>6</sub> (1.3 g, 8.0 mmol) was added and the mixture stirred for 2h. The resulting precipitates were filtrated and washed with a small amount of water and dried to give compound **PBDV** as a light yellow solid (0.86 g, yield 86%). <sup>1</sup>H NMR (400 MHz, CD<sub>3</sub>CN): δ 9.68 (d, *J* = 4.0 Hz, 4 H), 8.94 (d, *J* = 8.0 Hz, 4 H), 8.84 (s, 2 H), 8.78 (d, *J* = 4.0Hz, 4 H), 8.53 (d, *J* = 8.0 Hz, 4 H), 4.46 (s, 6 H). <sup>13</sup>C NMR (125 MHz, CD<sub>3</sub>CN): δ 158.76, 147.57, 145.37, 128.82, 128.13 and 49.67. MS (ESI): *m/z* 420.1 [M - 4PF<sub>4</sub>]<sup>+</sup>. HRMS(MALDI): Calcd. for C<sub>26</sub>H<sub>24</sub>N<sub>6</sub>: 420.2057. Found: 420.2053.

**Compound 3.**<sup>1</sup> 1,5-dioxynaphthalene (1.0 g, 6.25mmol), K<sub>2</sub>CO<sub>3</sub> (1.034 g, 7.5 mmol), CH<sub>3</sub>I (0.43 mL, 6.24 mmol) and acetone (20 mL) were mixed in a 50 mL flask. The mixture was heated to reflux for 24h and filtrated after cooling to room temperature. The filtrate was evaporated and the resulting residue was dissolved in ethyl acetate, which was further washed with H<sub>2</sub>O and brine and dried over MgSO<sub>4</sub>. Column chromatography (acetone/PE = 1:5) was further used to give pure compound **3** as an yellow-green solid (0.4 g, yield 37%). <sup>1</sup>H NMR (300 MHz, acetone-*d*<sub>6</sub>): δ 8.90 (s,1 H), 7.81 (d, *J*=6.3 Hz,1 H), 7.71 (d, *J*=6.0Hz, 1 H), 7.36 (t, *J* = 6.0 Hz, 1 H), 7.27 (t, *J* = 6.0 Hz, 1 H), 6.94 (d, *J* = 6.0 Hz, 2 H), 4.00 (s,1 H). MS (EI): *m/z* 174[M]<sup>+</sup>.

**Compound 5.**<sup>2</sup> 1,5-dioxynaphthalene (5.0 g, 31 mmol) and K<sub>2</sub>CO<sub>3</sub> (1.8 g, 12.9 mmol) were placed in a 250 mL three-necked flask, which was then degassed and recharged with argon. Acetone (60 mL) was added and the mixture was heated to 50°C. Compound **4**<sup>3</sup> (2.6 g, 5.17 mmol, dissolved in 50 mL acetone) was then added slowly into the above reaction mixture. The mixture was refluxed for 12h and then cooled to room temperature. After being filtrated, the filtrate was evaporated and the resulting

residue was dissolved in ethyl acetate, which was further washed with H<sub>2</sub>O and brine and dried over MgSO<sub>4</sub> and concentrated under reduced pressure. The crude was purified by column chromatography (PE/EA = 2:1) to give compound **5** (1.13 g, yield 45%). <sup>1</sup>H NMR (300 MHz, CDCl<sub>3</sub>): δ 7.81 (d, *J*=6.3 Hz, 2 H), 7.72 (d, *J*=6.3 Hz, 2 H), 7.31 (t, *J*=6.3 Hz, 2 H), 7.21 (t, *J*=6.3 Hz, 2 H), 6.80 (d, *J*=5.4 Hz, 2 H), 6.75 (d, *J*=5.4 Hz, 2 H), 5.78 (s, 2 H), 4.22 (t, *J* = 3.6 Hz, 4 H), 3.95 (t, *J* = 3.6 Hz, 4 H), 3.78 (t, *J* = 1.5 Hz, 4 H), 3.72 (t, *J* = 1.8 Hz, 4 H). MS (ESI): *m/z* 477.2 [M-H]<sup>-</sup>.

**Compound 6.**<sup>4</sup> Prepared in 40% yield as a light purple oil from compound **4** and 1,5-dioxynaphthalene according to a procedure similar to that described for compound **5**. <sup>1</sup>H NMR (300 MHz, CDCl<sub>3</sub>): δ 7.84 (d, *J* = 8.7 Hz, 2 H), 7.77 (d, *J* = 8.4 Hz, 4 H), 7.31 (t, *J* = 6.6 Hz, 6 H), 6.83 (d, *J* = 7.8 Hz, 2 H), 4.28 (t, *J* = 4.6 Hz, 4 H), 4.12 (t, *J* = 4.8 Hz, 4 H), 3.98 (t, *J* = 4.9 Hz, 4 H), 3.78 (dd, *J*<sub>1</sub> = 3.8 Hz, *J*<sub>2</sub> = 5.4 Hz, 4 H), 3.67-3.57 (m, 16 H), 2.40 (s, 6 H). MS (ESI): *m/z* 843.4 [M + Na]<sup>+</sup>.

**Compounds 7**<sup>[5]</sup> and **D<sub>1</sub>**<sup>[6]</sup>. K<sub>2</sub>CO<sub>3</sub> (3.0 g, 23 mmol) and compound **3** (1.0 g, 5.75 mmol) were mixed in acetone (100 mL) and heated to reflux. Compound **4** (8.6 g, 17.2 mmol, dissolved in 60 mL acetone) was then added to the above reaction mixture slowly. The reaction mixture was refluxed for 24h. After being cooled to room temperature, the mixture was filtrated. The filtrate was evaporated and the resulting residue was dissolved in CH<sub>2</sub>Cl<sub>2</sub>, which was further washed with H<sub>2</sub>O and brine and dried over MgSO<sub>4</sub>. After being concentrated, the residue was subjected to column chromatography (acetone/PE = 1:5 to 1:3) to give compound **7** as a viscous oil (2.4 g, yield 83%) and compound **D<sub>1</sub>** as a white solid (0.24 g, yield 16%).

**Compound 7.** <sup>1</sup>H NMR (300 MHz, CDCl<sub>3</sub>): δ 7.82 (dd, *J*<sub>1</sub> = 3.6 Hz, *J*<sub>2</sub> = 8.7 Hz, 2 H), 7.75 (d, *J* = 8.1 Hz, 2 H), 7.33-7.26 (m, 5 H), 6.81 (d, *J* = 7.5 Hz, 2 H), 4.26 (t, *J* = 4.8 Hz, 2 H), 4.09 (t, *J* = 4.5 Hz, 2 H), 3.96 (t, *J* = 2.4 Hz, 5 H), 3.74 (t, *J* = 2.4 Hz, 2 H), 3.64-3.52 (m, 8 H). MS (ESI): *m/z* 527.4 [M+Na]<sup>+</sup>.

**Compound D<sub>1</sub>.** <sup>1</sup>H NMR (300 MHz, CDCl<sub>3</sub>): δ 7.84 (dd, *J*<sub>1</sub> = 1.5 Hz, *J*<sub>2</sub> = 8.1 Hz, 4 H), 7.34 (m, 4 H), 6.81 (d, *J* = 5.7 Hz, 4 H), 4.26 (t, *J* = 3.6 Hz, 4 H), 3.96 (t, *J* = 3.6 Hz, 10 H), 3.78 (t, *J* = 1.8 Hz, 4 H), 3.72 (t, *J* = 1.8 Hz, 4 H). MS (ESI): *m/z* 529.5 [M + Na]<sup>+</sup>.

**Compound 8.**<sup>[5]</sup> Prepared in 45% yield as an oil from 1,5-dioxynaphthalene and compound **7** according to a procedure similar to that described for compound **5**. <sup>1</sup>H NMR (300 MHz, CDCl<sub>3</sub>): δ 7.86-7.73 (m, 4 H), 7.36-7.19 (m, 4 H), 6.82-6.74 (m, 4 H), 6.10 (s, 1 H), 4.22 (dd, *J*<sub>1</sub> = 3.0 Hz, *J*<sub>2</sub> = 3.6 Hz, 4 H), 3.96 (d, *J* = 4.2 Hz, 7 H), 3.78 (d, *J* = 3.9 Hz, 4 H), 3.72 (t, *J* = 3.6 Hz, 4 H). MS (ESI): *m/z* 515.2 [M + Na]<sup>+</sup>.

**Compound 9.**<sup>5</sup> Prepared in 80% yield as an oil from compound **3** and compound **6**

according to a procedure similar to that described for compound **5**.  $^1\text{H}$  NMR (300 MHz,  $\text{CDCl}_3$ ):  $\delta$  7.86-7.76 (m, 6 H), 7.36-7.29 (m, 6 H), 6.80 (dd,  $J_1 = 1.8$  Hz,  $J_2 = 5.7$  Hz, 4 H), 4.26 (dd,  $J_1 = 1.8$  Hz,  $J_2 = 6.6$  Hz, 6 H), 3.97 (t,  $J = 3.6$  Hz, 9 H), 3.80-3.76 (m, 8 H), 3.73-3.70 (m, 4 H), 3.66-3.64 (m, 4 H), 3.59-3.55 (m, 4 H), 2.40 (s, 3 H). MS (ESI):  $m/z$  845.4  $[\text{M} + \text{Na}]^+$ .

**Compound 10.**<sup>5</sup> Prepared in 76% yield as an oil from compound **6** and compound **8** according to a procedure similar to that described for compound **5**.  $^1\text{H}$  NMR (300 MHz,  $\text{CDCl}_3$ ):  $\delta$  7.86-7.81 (m, 6 H), 7.77 (d,  $J = 6.0$  Hz, 2 H), 7.36-7.28 (m, 8 H), 6.79 (t,  $J = 6.0$  Hz, 6 H), 4.27-4.22 (m, 10 H), 3.98 (d,  $J = 3.6$  Hz, 14 H), 3.79-3.75 (m, 11 H), 3.72-3.70 (m, 8 H), 3.66-3.63 (m, 4 H), 3.58-3.55 (m, 4 H), 2.40 (s, 3 H). MS (ESI):  $m/z$  1141.7  $[\text{M} + \text{H}]^+$ .

**Compound D<sub>2</sub>.**<sup>6</sup> Prepared in 55% yield from compound **5** and compound **7** according to a procedure similar to that described for compound **5**.  $^1\text{H}$  NMR (300 MHz,  $\text{CDCl}_3$ ):  $\delta$  7.84 (t,  $J = 7.8$  Hz, 8 H), 7.35 (m, 8 H), 6.78 (t,  $J = 8.1$  Hz, 8 H), 4.24 (dd,  $J_1 = 4.5$  Hz,  $J_2 = 4.8$  Hz, 12 H), 3.96 (s, 18 H), 3.79-3.70 (m, 24 H). MS (ESI):  $m/z$  1166.0  $[\text{M} + \text{Na}]^+$ .

**Compound D<sub>3</sub>.** Prepared in 40% yield from compound **5** and compound **9** according to a procedure similar to that described for compound **5**.  $^1\text{H}$  NMR (400 MHz,  $\text{CDCl}_3$ ):  $\delta$  7.84 (t,  $J = 12.0$  Hz, 12 H), 7.36-7.29 (m, 12 H), 6.81-6.77 (m, 12 H), 4.26-4.22 (m, 20 H), 3.98-3.94 (m, 26 H), 3.79-3.77 (m, 20 H), 3.72-3.70 (m, 20 H).  $^{13}\text{C}$  NMR (125 MHz,  $\text{CDCl}_3$ ): 155.31, 154.51, 154.47, 126.90, 126.86, 126.78, 125.25, 125.20, 114.75, 114.54, 105.83, 105.79, 104.63, 71.14, 69.95, 68.03 and 55.66. MS (MALDI):  $m/z$  1803.9  $[\text{M} + \text{Na}]^+$ . HRMS(MALDI): Calcd. for  $\text{C}_{102}\text{H}_{122}\text{O}_{27}\text{Na}$ : 1801.8051. Found: 1801.8065.

**Compound D<sub>4</sub>.** Prepared in 50% yield from compound **5** and compound **10** according to a procedure similar to that described for compound **5**.  $^1\text{H}$  NMR (400 MHz,  $\text{CDCl}_3$ ):  $\delta$  7.84 (t,  $J = 12.0$  Hz, 16 H), 7.34-7.29 (m, 16 H), 6.81-6.77 (m, 16 H), 4.26-4.22 (m, 26 H), 3.97-3.94 (m, 32 H), 3.79-3.77 (m, 30 H), 3.72-3.70 (m, 30 H).  $^{13}\text{C}$  NMR (125 MHz,  $\text{CDCl}_3$ ): 155.18, 154.38, 154.34, 126.77, 126.72, 126.64, 125.15, 125.11, 114.62, 114.40, 105.70, 105.67, 104.52, 70.98, 69.80, 67.88 and 55.52. MS (MALDI):  $m/z$  2439.8  $[\text{M} + \text{Na}]^+$ . HRMS(MALDI): Calcd. for  $\text{C}_{138}\text{H}_{166}\text{O}_{37}\text{Na}$ : 2438.1013. Found: 2438.1000.

## Typical procedures for the spectroscopic experiments

### <sup>1</sup>H NMR experiments

Compound **PBDV**, DAN oligomers **D<sub>1</sub>-D<sub>4</sub>** and their equivalent molar mixtures were dissolved in a binary solvent CD<sub>3</sub>CN/CDCl<sub>3</sub> (4:1), respectively. All the samples were treated with ultra-sonication and the resulting homogeneous solutions were then subjected to a Bruker Advance 400 MHz spectrometer at ambient temperature.

### The UV-vis titrations and evaluation of binding constants

Aliquots of a stock solution of compound **PBDV** (1.0 mM) in a binary solvent CH<sub>3</sub>CN/CHCl<sub>3</sub> (4:1) were added to the solutions of DAN oligomers **D<sub>1</sub>-D<sub>4</sub>** ( $1.0 \times 10^{-5}$  M) in CH<sub>3</sub>CN/CHCl<sub>3</sub> (4:1), respectively. The mixtures were subjected to a Unico-4802 UV-vis double beam spectrophotometer at 25 °C and the spectra were then recorded. The association constants for the 1:1 complexes were determined by Benesi-Hildebrand (B-H) plots (O. K. Abou-Zied, *Spectrochimica Acta Part A*, 2005, **62**, 245-251.).

### The fluorescence titrations and Job's plots

Aliquots of a stock solution of compound **PBDV** (2.0 mM) in a binary solvent CH<sub>3</sub>CN/CHCl<sub>3</sub> (4:1) were added to the solutions of DAN oligomers **D<sub>1</sub>-D<sub>4</sub>** ( $3.0 \times 10^{-6}$  M) CH<sub>3</sub>CN/CHCl<sub>3</sub> (4:1), respectively, and the fluorescence spectra were recorded with a F-4600 FL spectrophotometer at 25 °C. The excitation wavelength was 329 nm with the slit of  $a = b = 5.0$  nm under a voltage of 400 V. For the Job's plots, the fluorescence emissions of the solutions of DAN oligomers **D<sub>1</sub>-D<sub>4</sub>** were reordered in the presence of varied ratio of compound **PBDV** (9:1~1:9) in a binary solvent CH<sub>3</sub>CN/CHCl<sub>3</sub> (4:1), with a total concentration of ( $[D_n] + [PBDV]$ ) to be  $1.5 \times 10^{-7}$  M at 25°C. The differences in emission intensity ( $\Delta Int$ ) of the DAN oligomers in the presence and absence of compound **PBDV** were plotted against  $[D_n]/([D_n] + [PBDV])$  to generate the Job's plots.

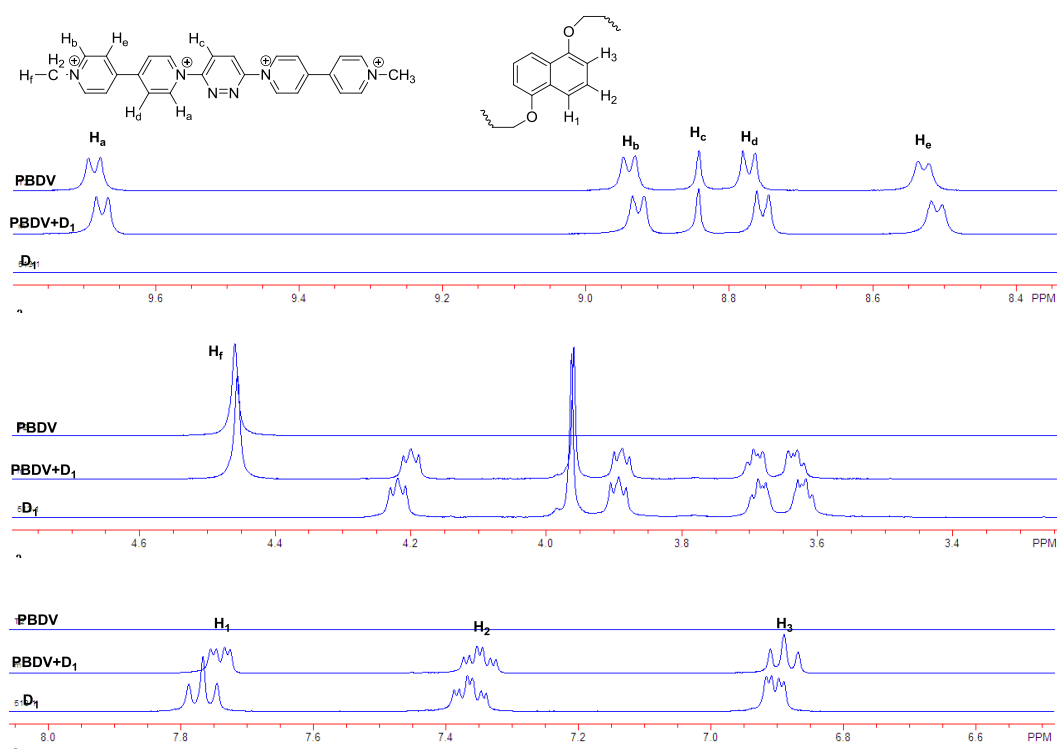

**Figure S1** Partial  $^1\text{H}$  NMR spectra of **PBDV**,  **$\text{D}_1$**  and their 1:1 mixture in  $\text{CD}_3\text{CN}/\text{CDCl}_3$  (4:1, 3.0 mM).

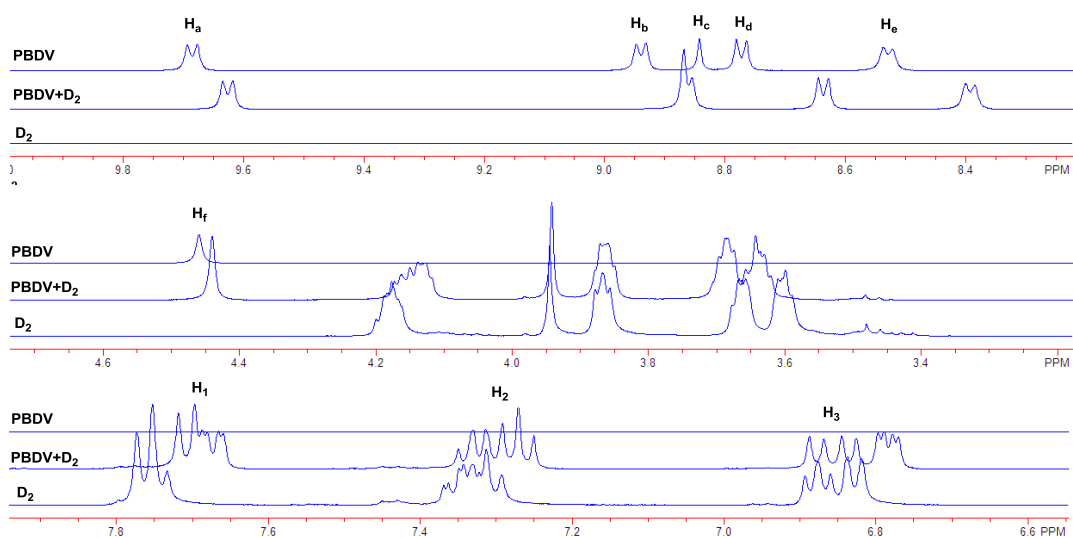

**Figure S2** Partial  $^1\text{H}$  NMR spectra of **PBDV**,  **$\text{D}_2$**  and their 1:1 mixture in  $\text{CD}_3\text{CN}/\text{CDCl}_3$  (4:1, 3.0 mM).

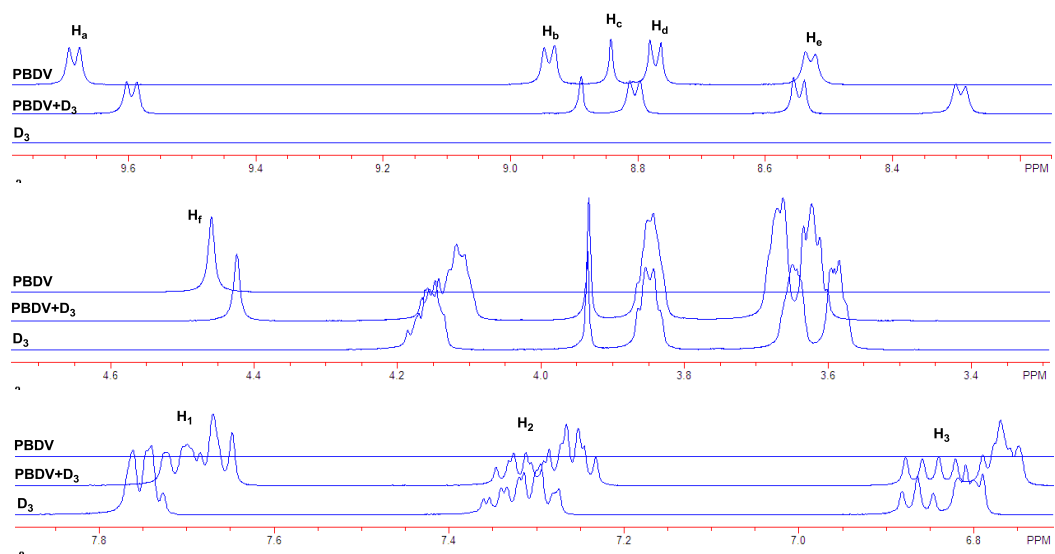

**Figure S3** Partial  $^1\text{H}$  NMR spectra of **PBDV**, **D<sub>3</sub>** and their 1:1 mixture in  $\text{CD}_3\text{CN}/\text{CDCl}_3$  (4:1, 3.0 mM).

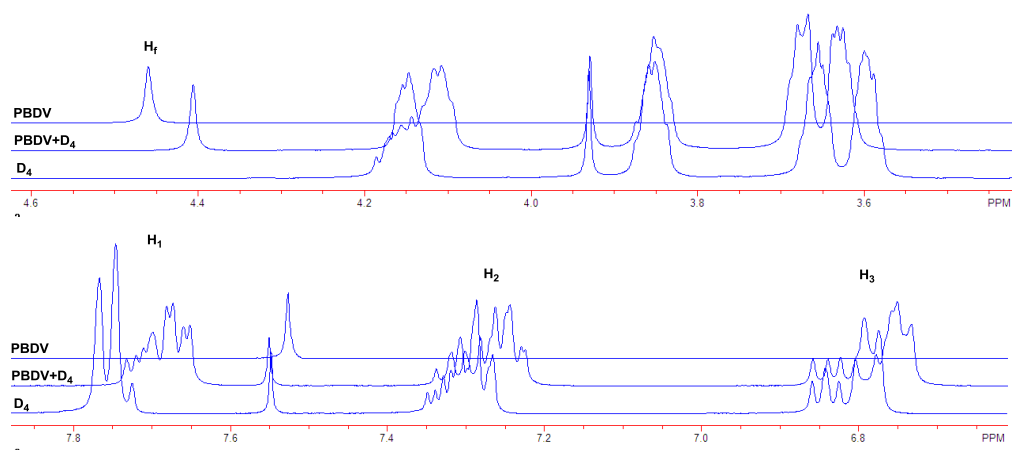

**Figure S4** Partial  $^1\text{H}$  NMR spectra of **PBDV**, **D<sub>4</sub>** and their 1:1 mixture in  $\text{CD}_3\text{CN}/\text{CDCl}_3$  (4:1, 3.0 mM).

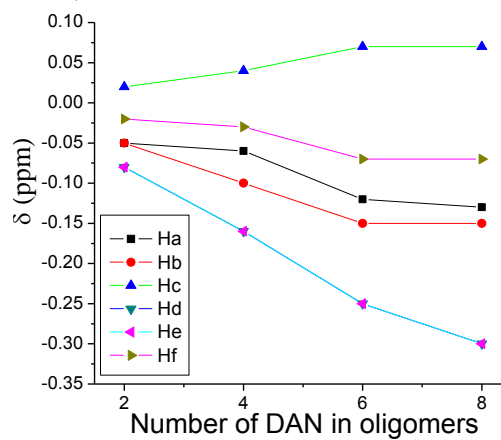

**Figure S5** Chemical shift changes of the protons of **PBDV** after being mixed with equivalent DAN oligomers in  $\text{CD}_3\text{CN}/\text{CDCl}_3$  (4:1). The concentration of DAN unit was 3.0 mM.

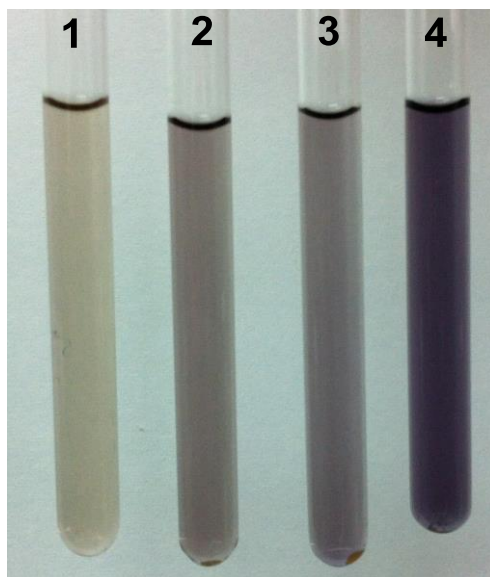

**Figure S6** Color of the mixtures of equivalent **PBDV** and DAN oligomers in  $\text{CD}_3\text{CN}/\text{CDCl}_3$  (4:1, 3.0 mM) at 25 °C.

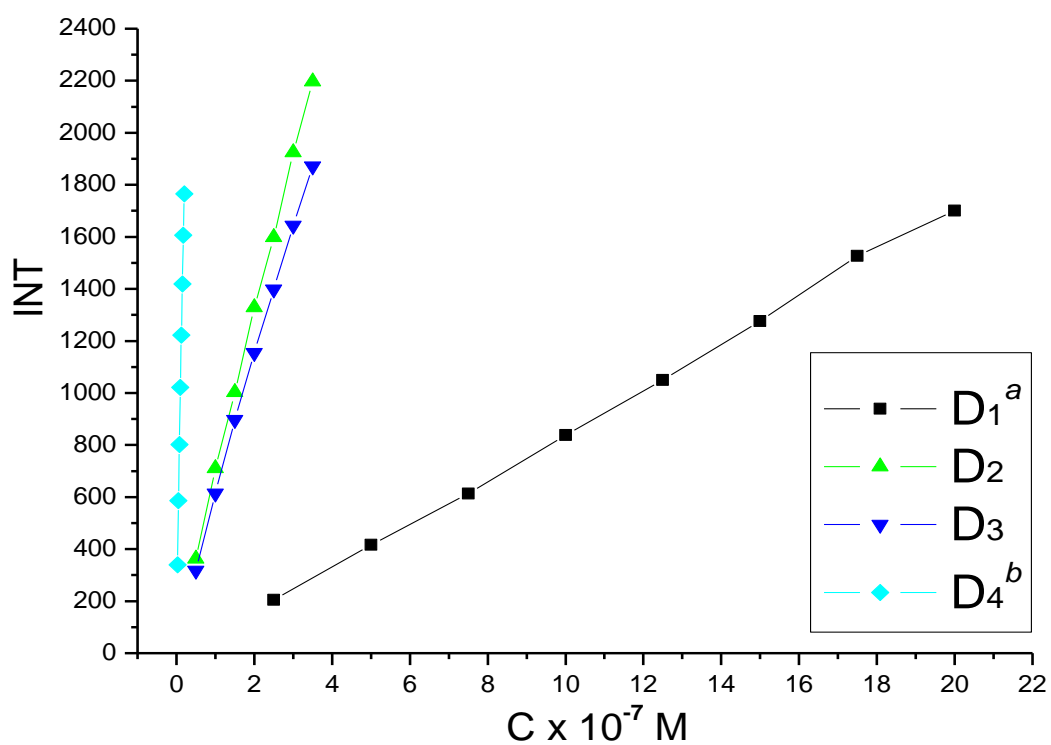

**Figure S7** Fluorescence intensity titration plots (Ex at 329 nm) of **D<sub>1</sub>-D<sub>4</sub>** vs concentration in  $\text{CH}_3\text{CN}$  at 25 °C. Slit *a*: 5.0 nm; *b*: 10.0 nm.



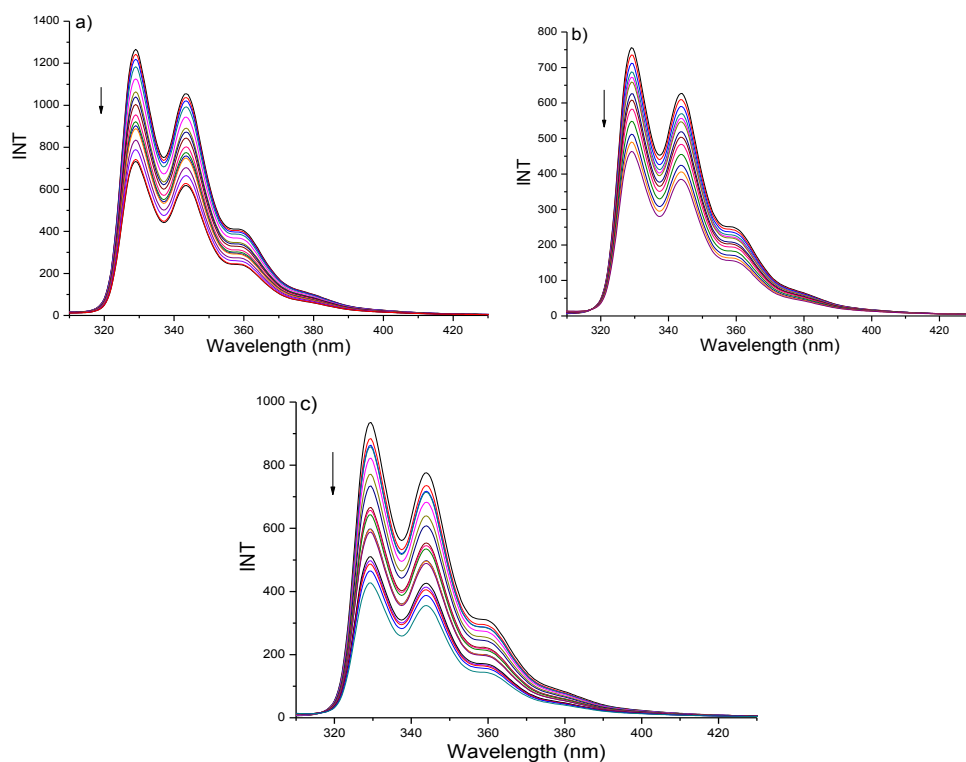

**Figure S8** Fluorescence titration spectra of (a) **D<sub>1</sub>**, (b) **D<sub>2</sub>**, and (c) **D<sub>3</sub>** with **PBDV** in **CH<sub>3</sub>CN** at 25°C. The concentration of DAN unit was  $3.0 \times 10^{-6}$  M.

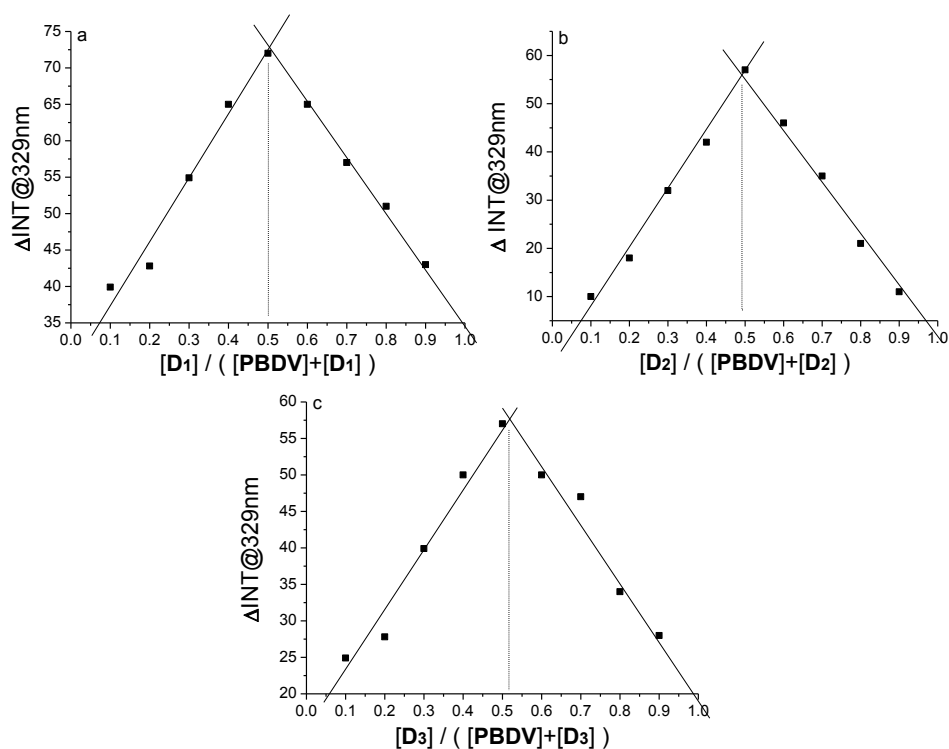

**Figure S9** Job's plots of (a) **PBDV + D<sub>1</sub>**, (b) **PBDV + D<sub>2</sub>**, and (c) **PBDV + D<sub>3</sub>** generated by fluorescence spectroscopy.

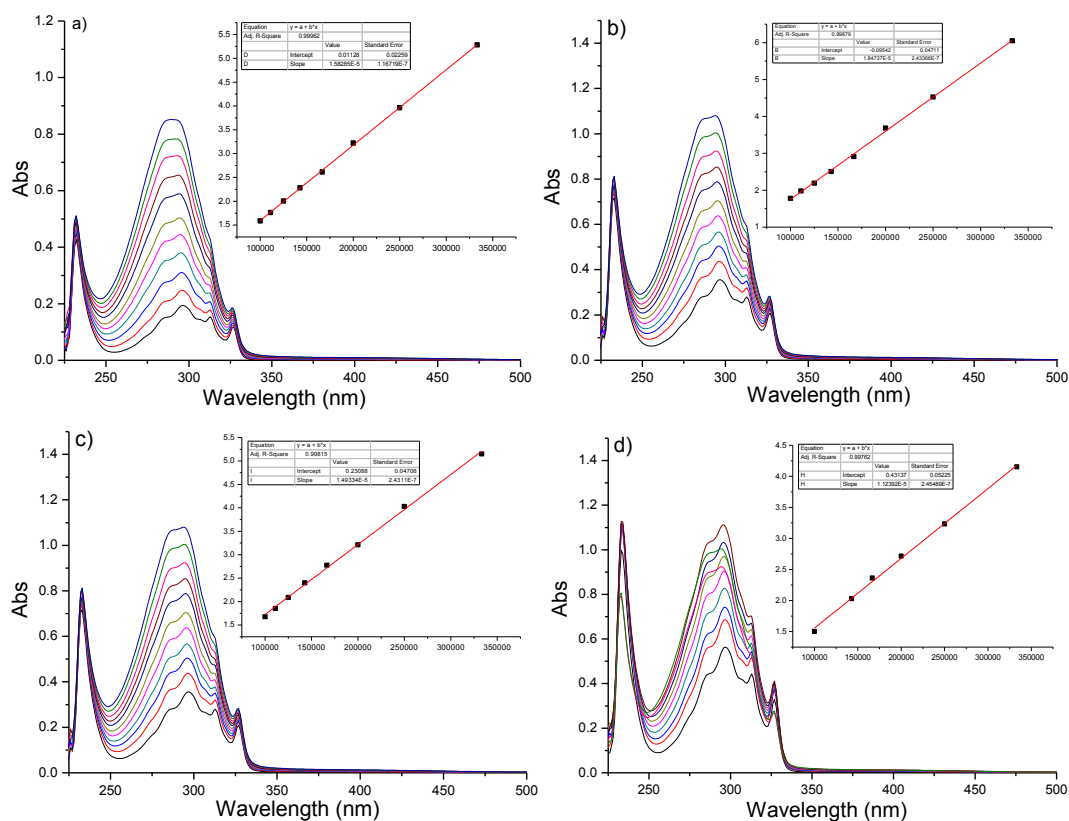

**Figure S10.** UV-*vis* titration spectra of (a) **D<sub>1</sub>**, (b) **D<sub>2</sub>**, (c) **D<sub>3</sub>**, and (d) **D<sub>4</sub>** with **PBDV** in CH<sub>3</sub>CN/CHCl<sub>3</sub> (4:1) at 25°C. Inset: B-H plots. The concentration of DAN oligomer was 1.0 × 10<sup>-5</sup> M.

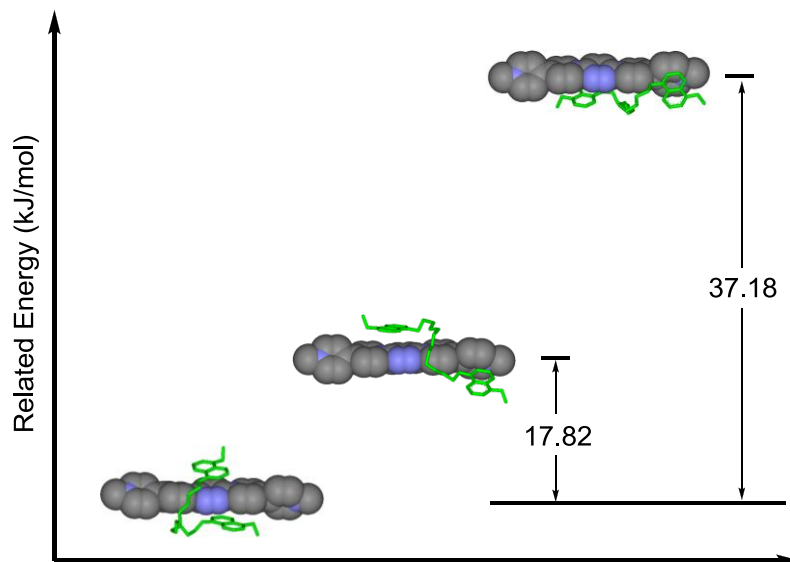

**Figure S11** Energy diagram of representative optimized structures of (**PBDV** + **D<sub>1</sub>**) obtained by DFT calculations at B3LYP/6-31G level.

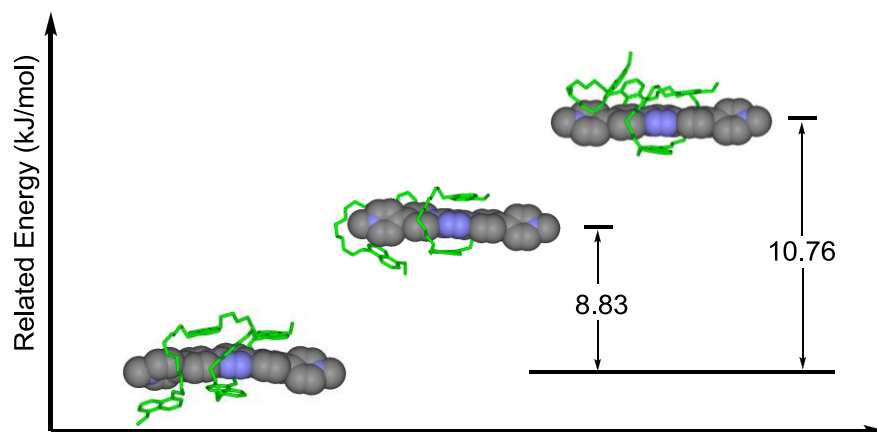

**Figure S12** Energy diagram of representative optimized structures of (PBDV + D<sub>2</sub>) obtained by DFT calculations at B3LYP/6-31G level.

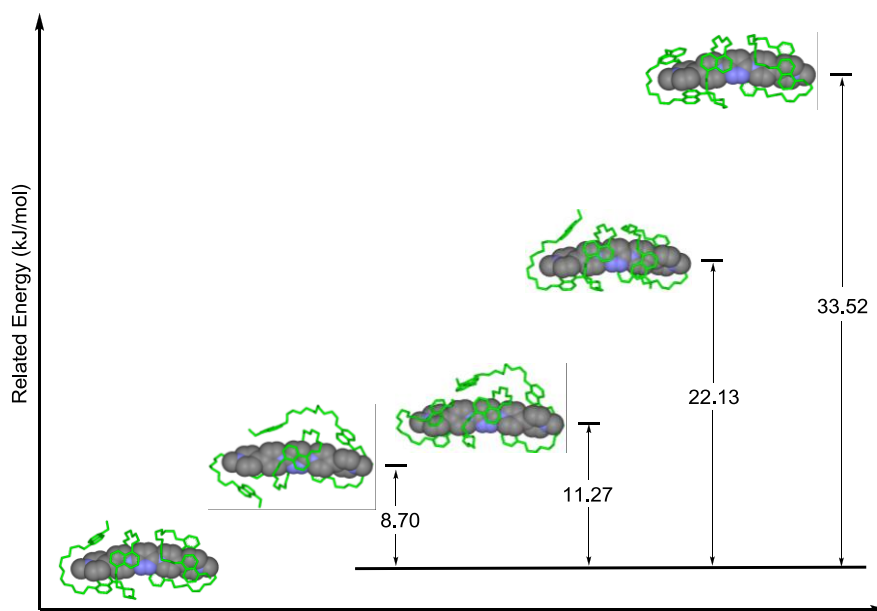

**Figure S13** Energy diagram of representative optimized structures of (PBDV + D<sub>3</sub>) obtained by DFT calculations at B3LYP/6-31G level.

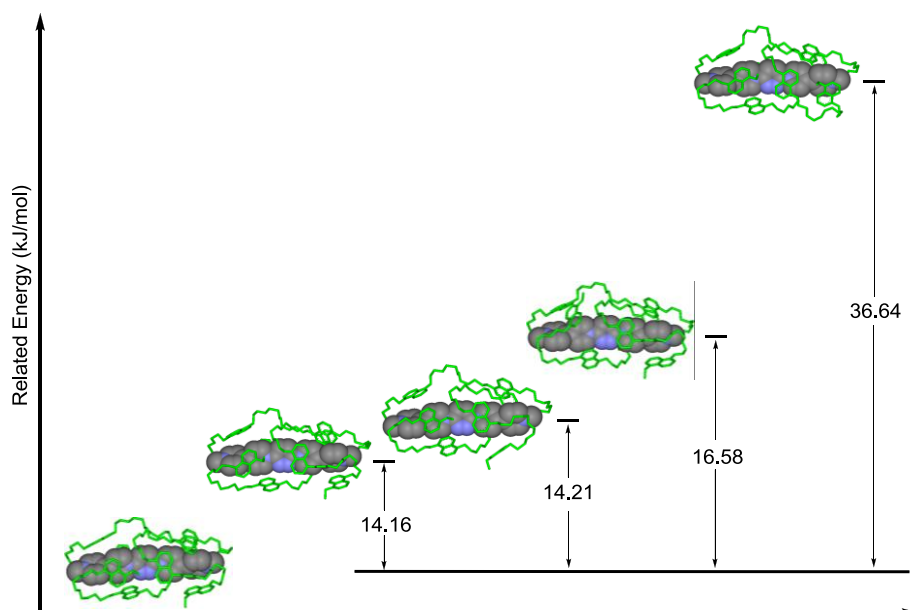

**Figure S14** Energy diagram of representative optimized structures of (PBDV + D<sub>4</sub>) obtained by DFT calculations at B3LYP/6-31G level.

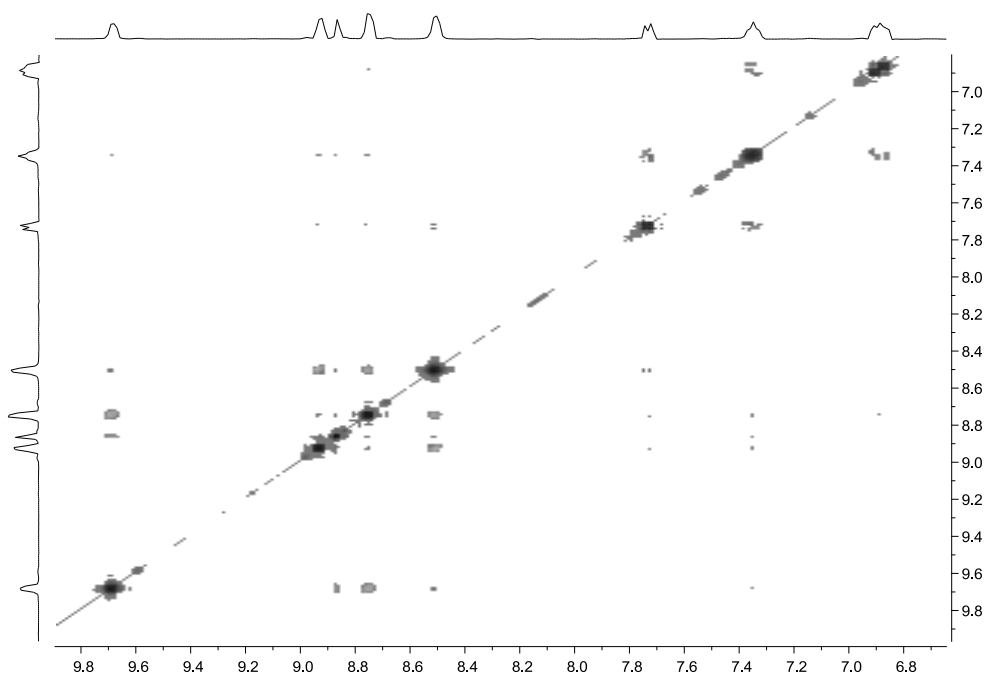

**Figure S15** Partial <sup>1</sup>H NMR 2D NOESY spectrum of (PBDV + D<sub>1</sub>, 1:1) in CD<sub>3</sub>CN/CDCl<sub>3</sub> (4:1, 3.0 mM).

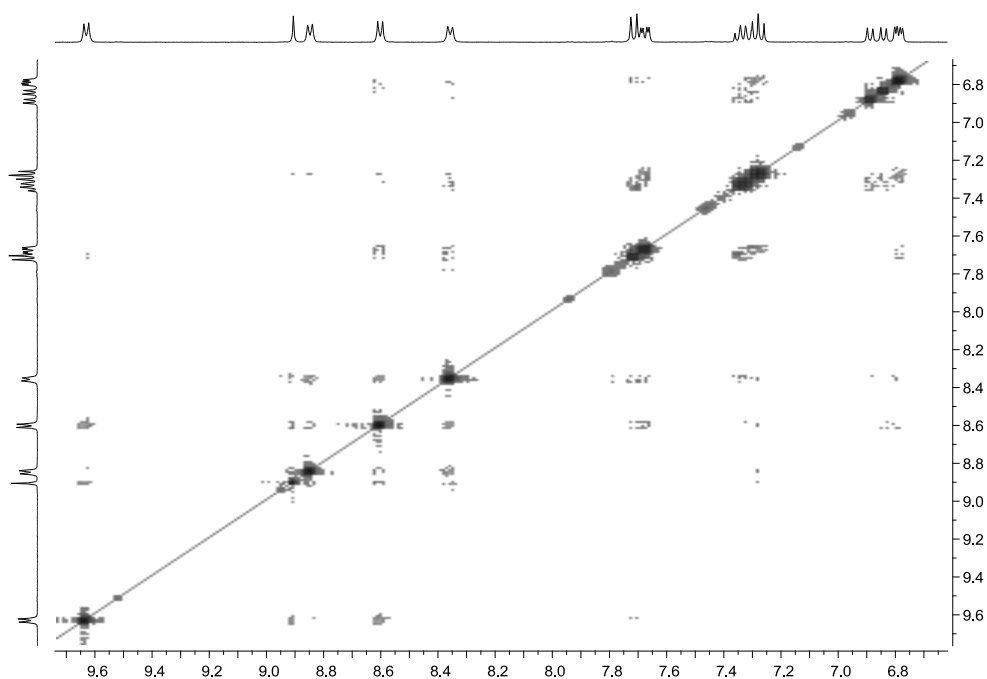

**Figure S16** Partial <sup>1</sup>H NMR 2D NOESY spectrum of (PBDV + D<sub>2</sub>, 1:1) in CD<sub>3</sub>CN/CDCl<sub>3</sub> (4:1, 3.0 mM).

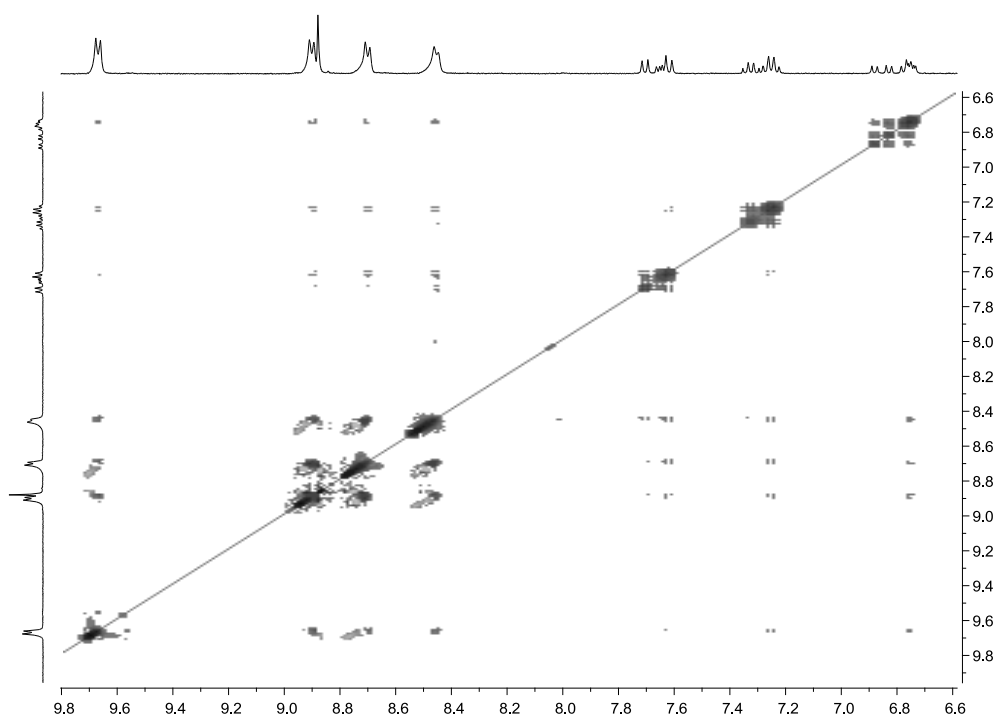

**Figure S17** Partial <sup>1</sup>H NMR 2D NOESY spectrum of (PBDV + D<sub>3</sub>, 1:1) in CD<sub>3</sub>CN/CDCl<sub>3</sub> (4:1, 3.0 mM).

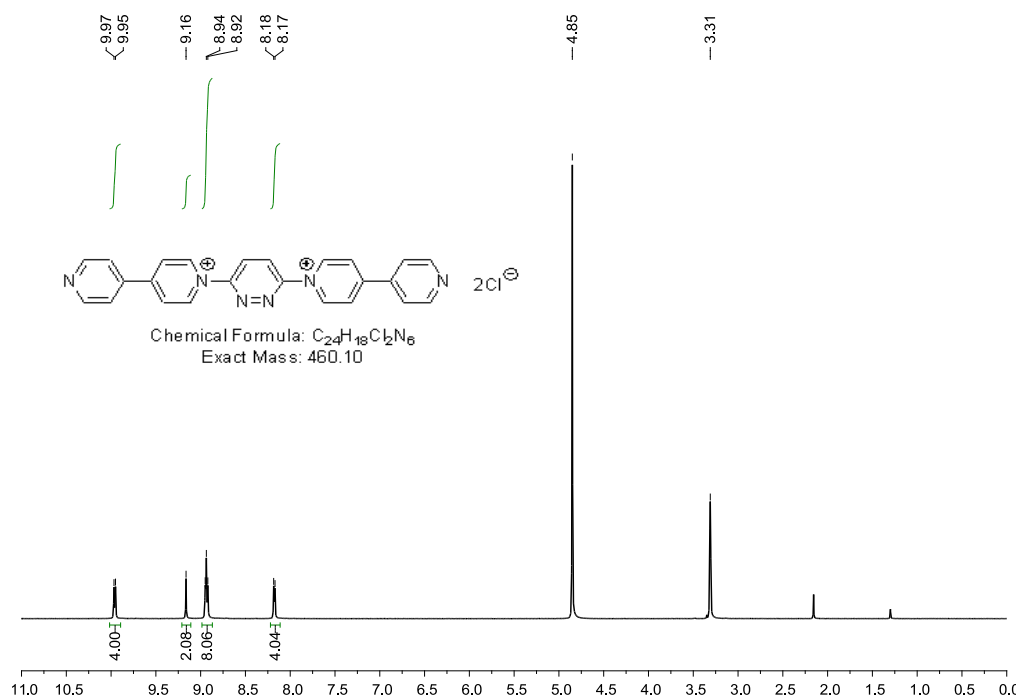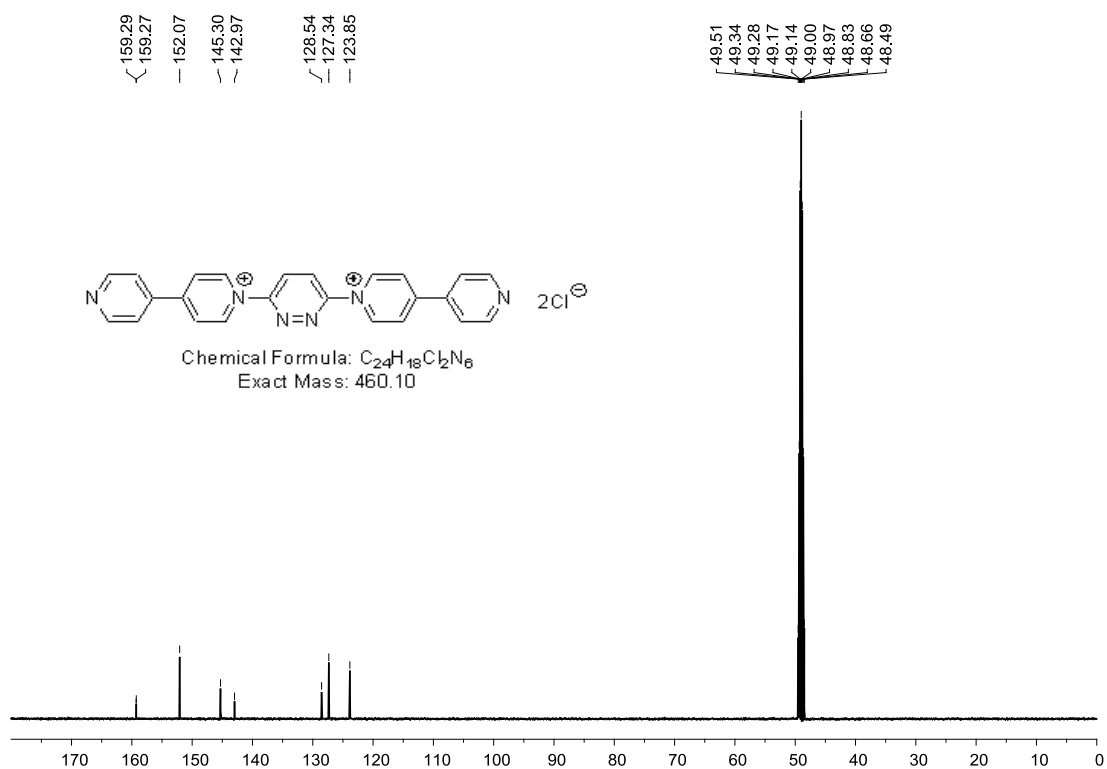

**Figure S18**  $^1H$  NMR and  $^{13}C$  NMR spectra of compound **1** in  $CD_3OD$ .

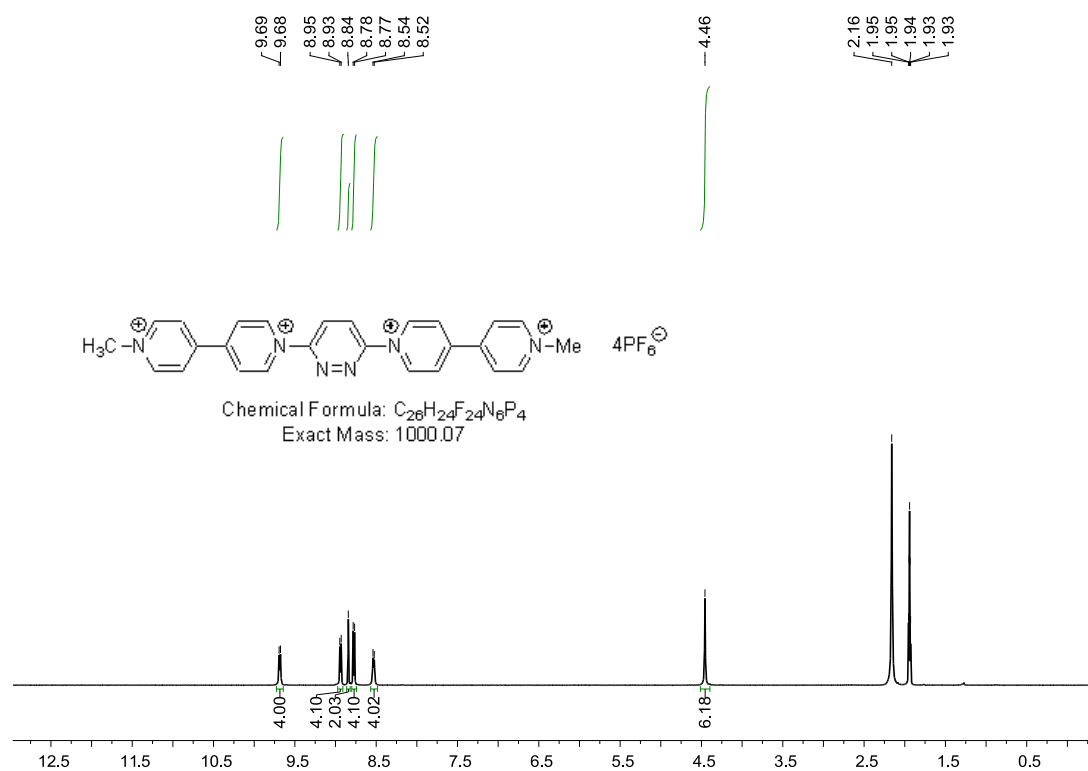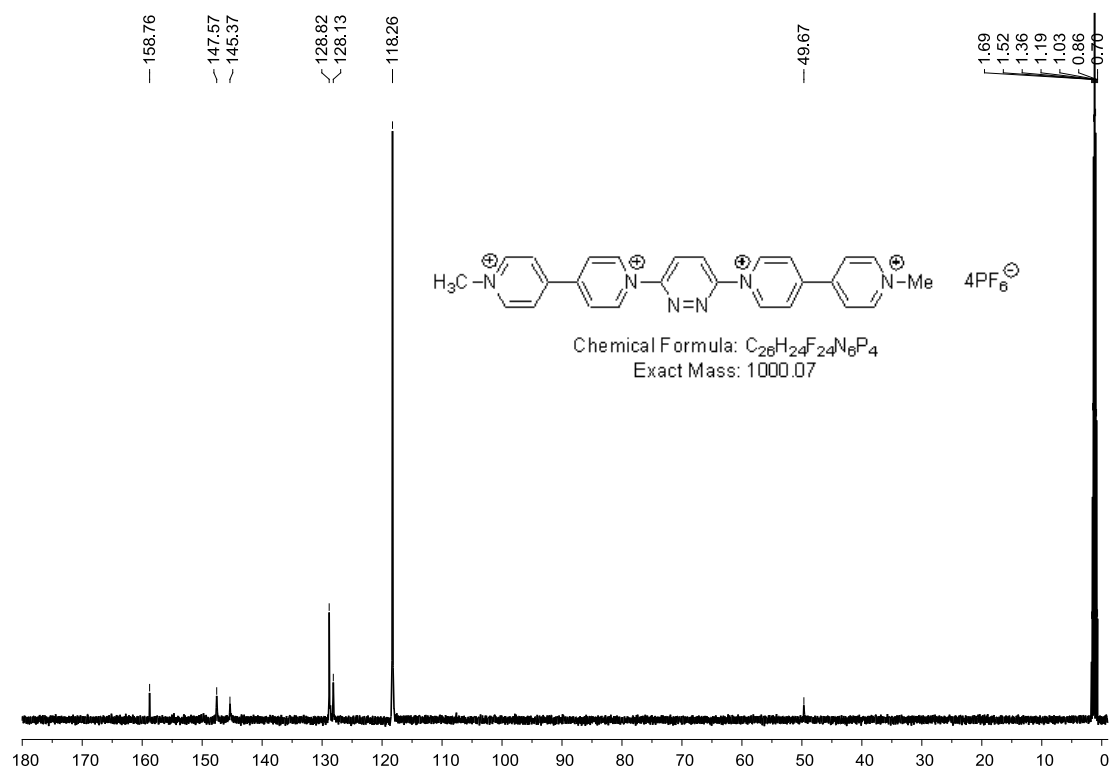

**Figure S19**  $^1H$  NMR and  $^{13}C$  NMR spectra of **PBDV** in  $CD_3CN$ .

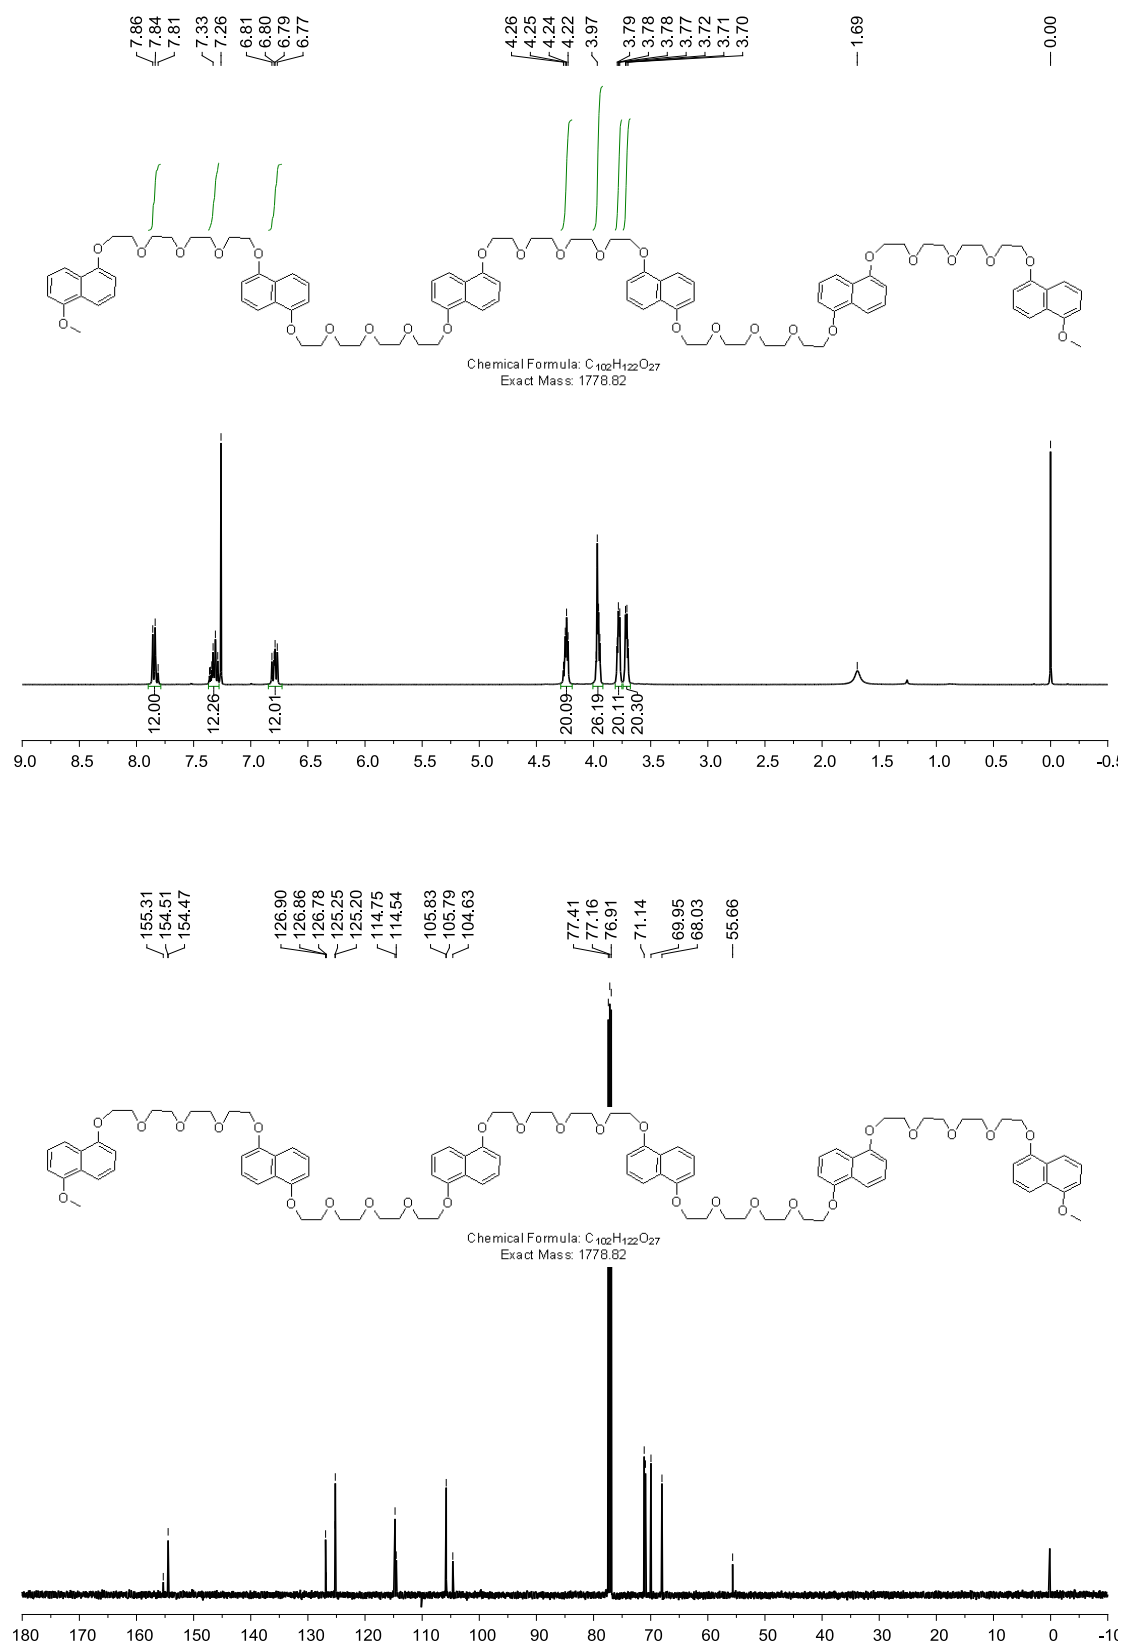

Figure S20  $^1H$  NMR and  $^{13}C$  NMR spectra of **D<sub>3</sub>** in  $CDCl_3$ .



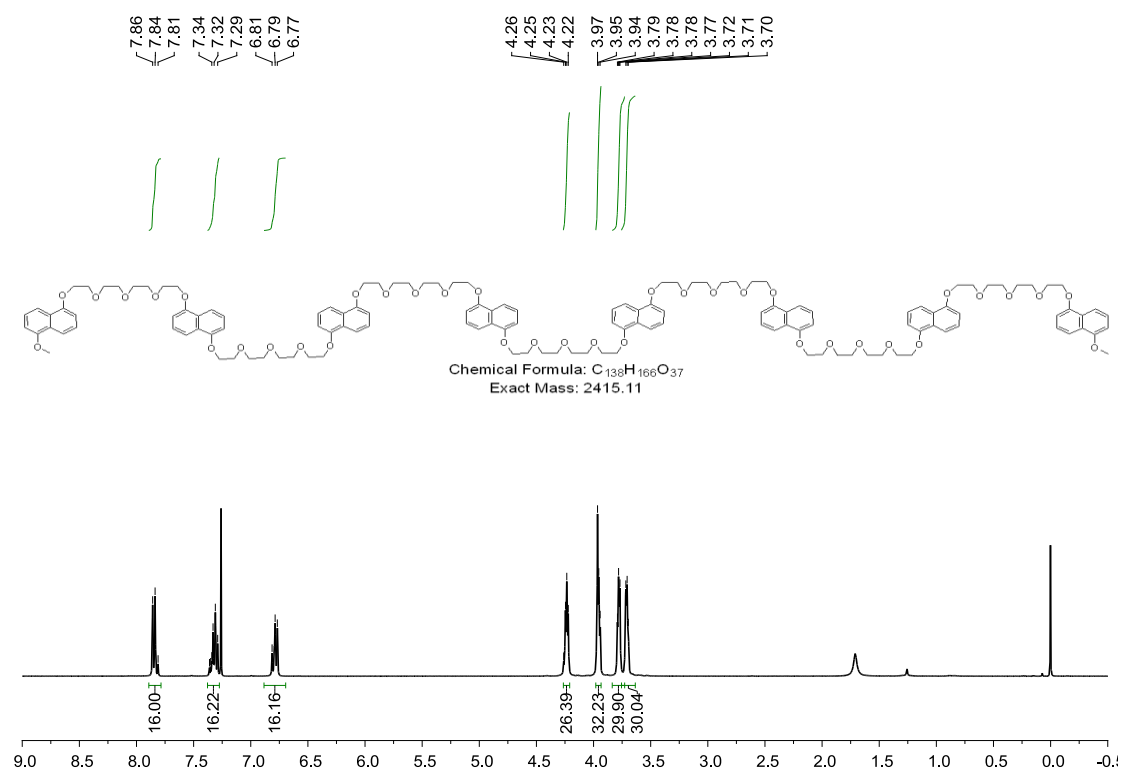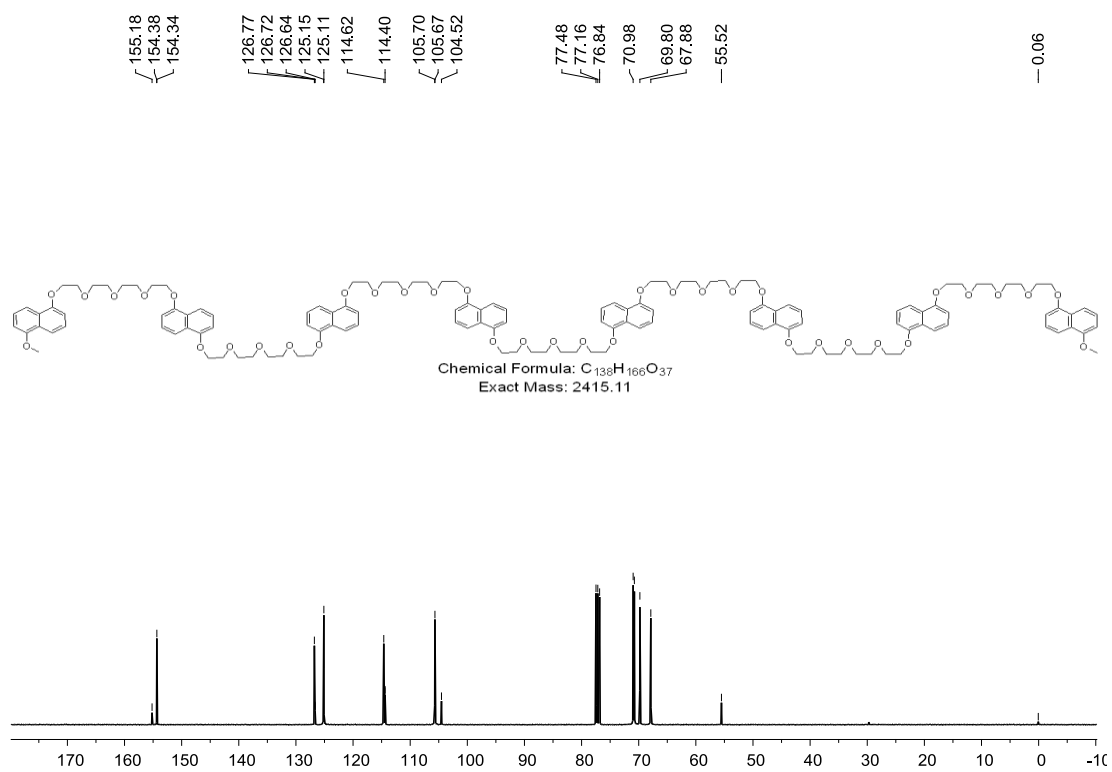

**Figure S21**  $^1H$  NMR and  $^{13}C$  NMR spectra of **D<sub>4</sub>** in  $CDCl_3$ .

References:

- (1) J. Becher, O. A. Matthews, M. B. Nielsen, F. M. Raymo and J. F. Stoddart, *Synlett*, 1999, 330-332.
- (2) D. G. Hamilton, M. Montalti, L. Prodi, M. Fontani, P. Zanello and J. K. M. Sanders, *Chem. Eur. J.*, 2000, **6**, 608-617.
- (3) C.-H. Tung, Z.-Y. Yuan, L.-Z. Wu and R. G. Weiss, *J. Org. Chem.*, 1999, **64**, 5156-5161.
- (4) L. Raehm, D. G. Hamilton and J. K. M. Sanders, *Synlett* 2002, 1743-1761.
- (5) Q.-Z. Zhou, M.-X. Jia, X.-B. Shao, L.-Z. Wu, X.-K. Jiang, Z.-T. Li and G.-J. Chen, *Tetrahedron*, 2005, **61**, 7117-7124.
- (6) Q.-Z. Zhou, X.-K. Jiang, X.-B. Shao, G.-J. Chen, M.-X. Jia and Z.-T. Li, *Org. Lett.*, 2003, **5**, 1955-1958.
